# Supplementary material for: Two Pb2+-specific DNAzymes with opposite trends in split-site-dependent activity
Source: Royal Society of Chemistry journal article supplement (doi:10.1039/c4cc00864b), 2014-01-01
Supplement: c4cc00864b1.pdf [file c4cc00864b1.pdf]

## Supporting Information

### Two $\text{Pb}^{2+}$ -specific DNazymes with opposite trends in split-site-dependent activity

Po-Jung Jimmy Huang<sup>a</sup> and Juewen Liu<sup>a,\*</sup>

Department of Chemistry, Waterloo Institute for Nanotechnology, University of Waterloo, Waterloo, Ontario, N2L 3G1, Canada. Fax: 519 7460435; Tel: 519 8884567 Ext. 38919; E-mail: [liujw@uwaterloo.ca](mailto:liujw@uwaterloo.ca)

#### Materials and Methods

**1. Chemicals.** The FAM-labeled substrate strand was purchased from Integrated DNA Technologies (IDT, Coralville, IA). The split enzyme strands are from Eurofins. Lead acetate was from Sigma-Aldrich.  $\text{Pb}^{2+}$  ions, urea, buffer and gel stock solutions were prepared with Milli-Q water. 2-[4-(2-hydroxyethyl)piperazin-1-yl]ethanesulfonic acid (HEPES) sodium salt, HEPES free acid and NaCl were from Mandel Scientific (Guelph, ON, Canada). 10× TBE and urea were purchased from Biobasic Inc. (Markham, ON, Canada).

**2. Activity assays.** For a typical gel-based activity assay, a final of 10  $\mu\text{M}$   $\text{Pb}^{2+}$  was incubated with 5  $\mu\text{L}$  of 1  $\mu\text{M}$  DNzyme complex in buffer A (25 mM NaCl, 50 mM HEPES, pH 7.6). The DNzyme complexes were prepared by mixing the FAM-labeled substrate and the enzyme with molar ratio 1:1.5 in buffer A. The mixture was annealed at 90 °C and gradually cooled down to room temperature. The enzymatic reactions were quenched with 8 M urea and run in 15% dPAGE at 120V for 80 min. The gel images were taken with Bio-Rad ChemiDoc MP imaging system. For kinetic experiments, a large volume of reaction mixture was prepared and aliquots were taken at designated time points into the quenching buffer.
